# Supplementary material
Source: PubMed Central journal article supplement (PMC6461038)
Supplement: NIHMS1012377-supplement-S1.pdf [file NIHMS1012377-supplement-S1.pdf]

**Current Biology, Volume 28**

**Supplemental Information**

**Extremely Divergent Haplotypes in Two  
Toxin Gene Complexes Encode Alternative  
Venom Types within Rattlesnake Species**

**Noah L. Dowell, Matt W. Giorgianni, Sam Griffin, Victoria A. Kassner, Jane E. Selegue, Elda E. Sanchez, and Sean B. Carroll**

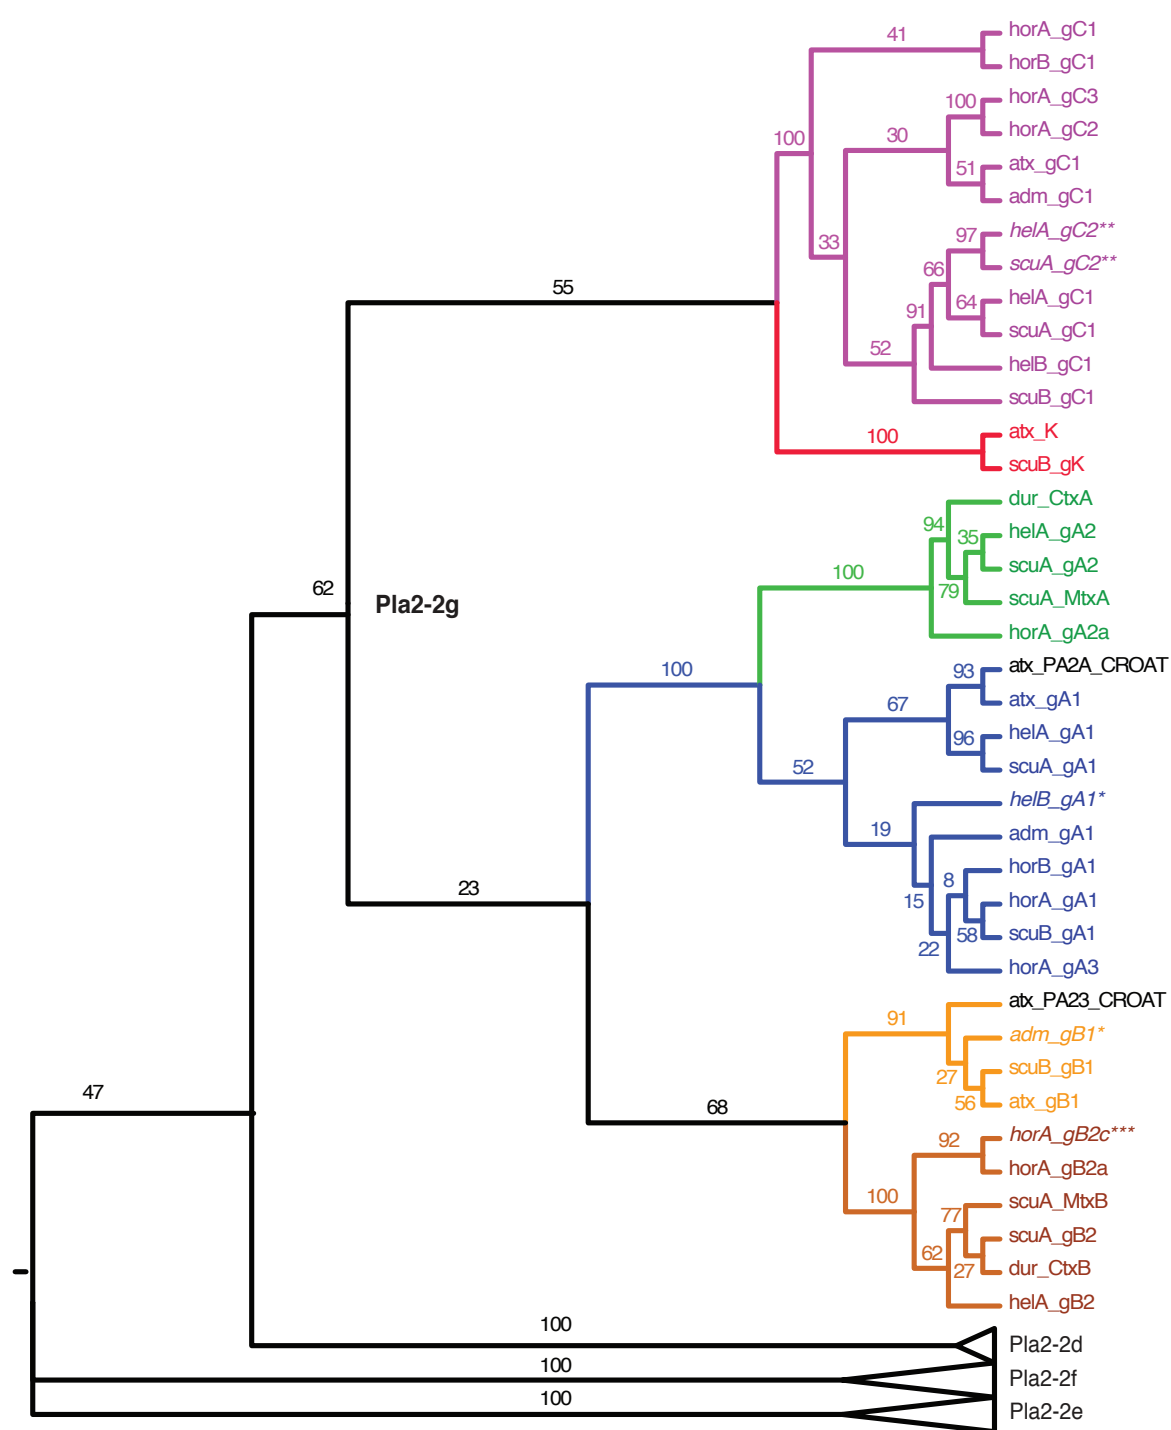

**Figure S1. Phylogenetic analysis of PLA2 proteins. Related to Figures 2 and 3.**

Protein phylogeny of full-length Pla2 proteins was used to identify gene orthologs in PLA2 complexes. The figure shows the gene members of the *C. scutulatus* B type complex, *Pla2-gB1* (scuB-gB1), *Pla2-gC1* (scuB-gC1) and *Pla2-gK* (scuB-gK) group with *C. atrox* (atx-gB1, -gC1, -gK) and *C. adamanteus* (adm-gC1, adm-gB1\*; with the asterisk identifying putative pseudo-genes.) Note the *C. scutulatus* type B complex does not contain genes encoding the neurotoxin heterodimer that are present in the *C. scutulatus* type A complex found in this study (scuA\_gB2 and scuA\_gA2) and identified previously (scuA\_MtxB and scuA\_MtxA and in *C. durissus terrificus*: dur\_CtxB and dur\_CtxA). Mutations in various genes suggest these are pseudogenes (italics) as they would result in untranslated or truncated products. In these instances, the exonic structure remains intact with some viable sequence information that was used to reconstruct the phylogenetic relationships of genes in the complex. Single asterisk (\*): adm gB1 has a single nucleotide deletion in the second exon which would result in a truncated protein. We have “restored” the deletion to more accurately establish the phylogenetic relationship of the pseudogene. Double asterisk (\*\*): scu gC2 and helA gC2 are missing the first exon. Triple asterisk (\*\*\*): horA gB2c has a deletion which removes the first three amino acids, including the start codon. Quadruple asterisk (\*\*\*\*): helB gA1 contains two frameshift mutations in the second exon which would yield a truncated protein. We have used sequence information from the three intact exons. Bootstrap values from 1,000 replicate trees are indicated on branches. Species included: *C. atrox* (atx for proteins presented in this study and database proteins: atx\_PA2A\_CROAT atx\_PA23\_CROAT), *C. scutulatus* A and B types (scuA & scuB), *C. helleri* A and B types (helA & helB), *C. adamanteus* (adm), *C. horridus* A and B types (horA & horB).

### C. scutulatus Phospholipase A2 (PLA2) gene complexes

#### A Neurotoxic (type A)

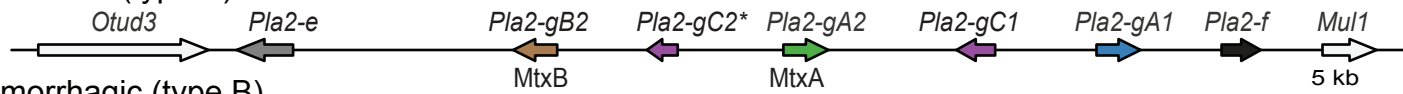

#### B Hemorrhagic (type B)

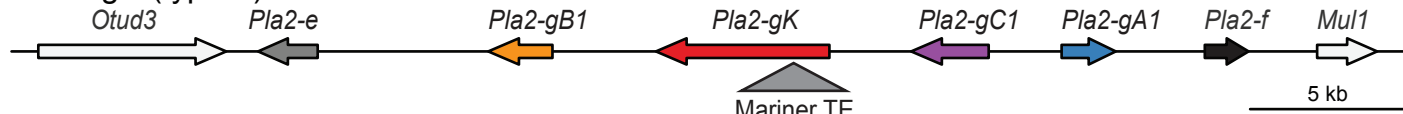

#### C

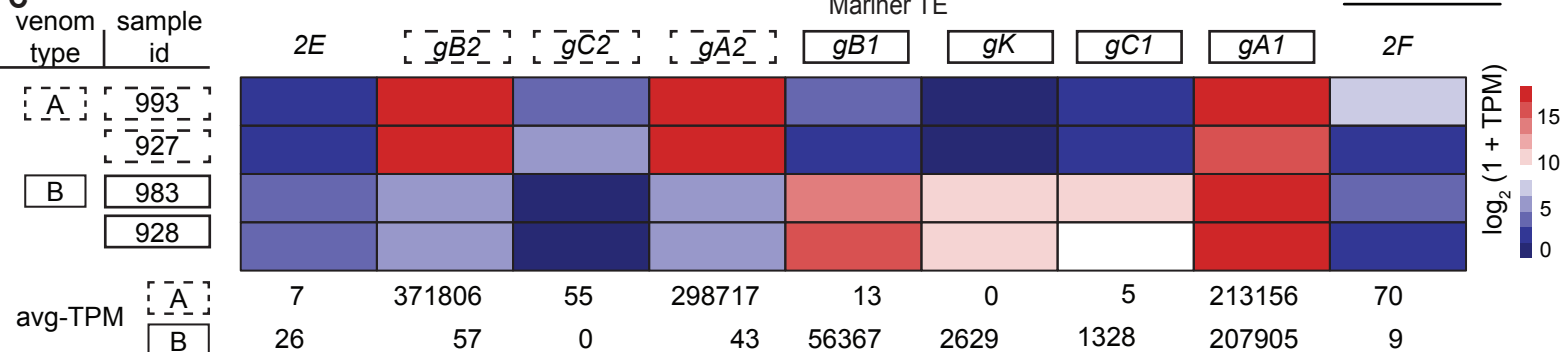

### C. scutulatus Metalloproteinase (MP) gene complexes

#### D Hemorrhagic (type B)

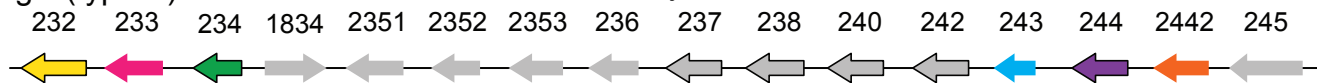

#### E Neurotoxic (type A)

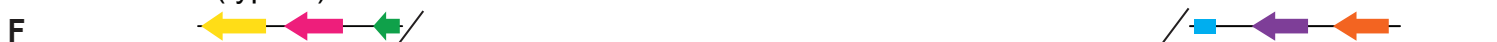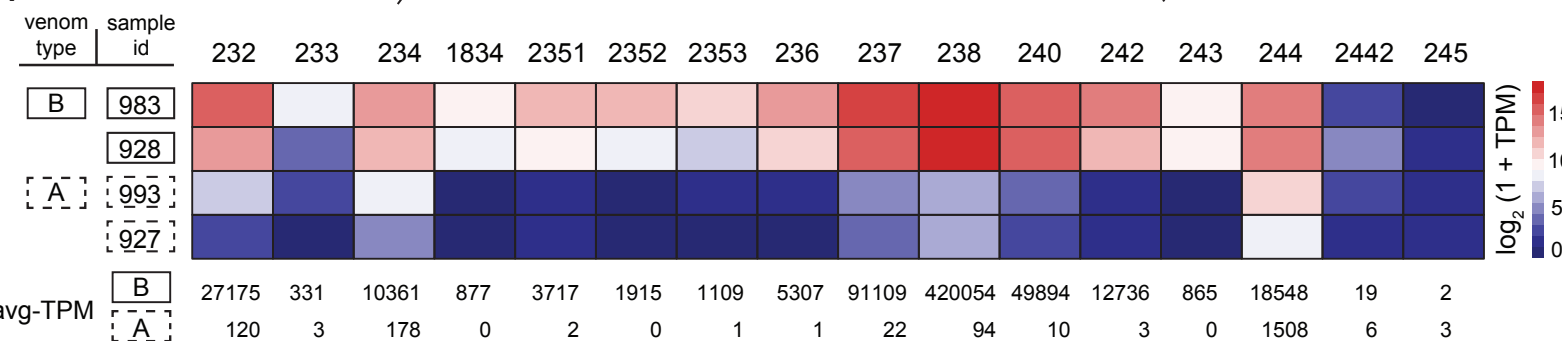

**Figure S2. Venom gland gene expression at the PLA2 and MP complexes in C. scutulatus. Related to Figure 2.**

(A) The *C. scutulatus* neurotoxic (type A) PLA2 gene complex. (B) The *C. scutulatus* hemorrhagic (type B) PLA2 gene complex. (C) A heatmap showing the relative level of venom gland gene expression (log base 2 transformed read counts) of the *Pla2* genes, with highly expressed genes in red and lowly expressed genes in blue. Neurotoxic (type A) specimens (993 and 927) and neurotoxin subunit genes are enclosed in dashed boxes. Hemorrhagic (type B) specimens (928 and 983) and genes are enclosed by solid boxes. Columns in the heatmap correspond to single a gene and are ordered by genomic location in the complex. The read counts (average transcripts per million; avg-TPM) for each venom type are listed below the heatmap. The neurotoxin-encoding genes (*Pla2-gB2* and *Pla2-gA2*) are highly expressed in type A, but not type B specimens. *Pla2-gB1* and *Pla2-gK* genes are expressed in animals with type B venom, however *Pla2-gK* expression is low relative to most venom *Pla2* genes. *Pla2-gK* protein has not been identified in previous studies of *C. scutulatus* type B venom composition. *Pla2-gA1* is highly expressed in both type A and type B animals. (D) The *C. scutulatus* hemorrhagic (type B) metalloproteinase (MP) gene complex. Medium to highly expressed genes are highlighted with a black outline of the gene arrow. (E) The *C. scutulatus* neurotoxic (type A) MP gene complex. The borders of a deleted segment are depicted as a forward slash. (F) A heatmap showing expression of MP complex genes in the venom gland (log base 2 transformed read counts). Columns correspond to a single gene and are ordered according the genomic position within the complex. The rows are individual specimens expressing either type B (solid boxes) or type A (dashed boxes) venom. Mean TPM values are shown below the heatmap for each venom type. The most highly expressed genes, 238, 237 and 240, with TPMs of 420054, 91109 and 49894, respectively, are located in the middle of the type B complex. Read counts for expression analysis were obtained by mapping venom gland reads to the annotated type B MP complex. Accurately mapping reads to highly duplicated regions of genomes is challenging and the type A TPM values for genes that are absent from the neurotoxic genome are likely artificially high due to the mis-mapping of reads originating from similar genes.

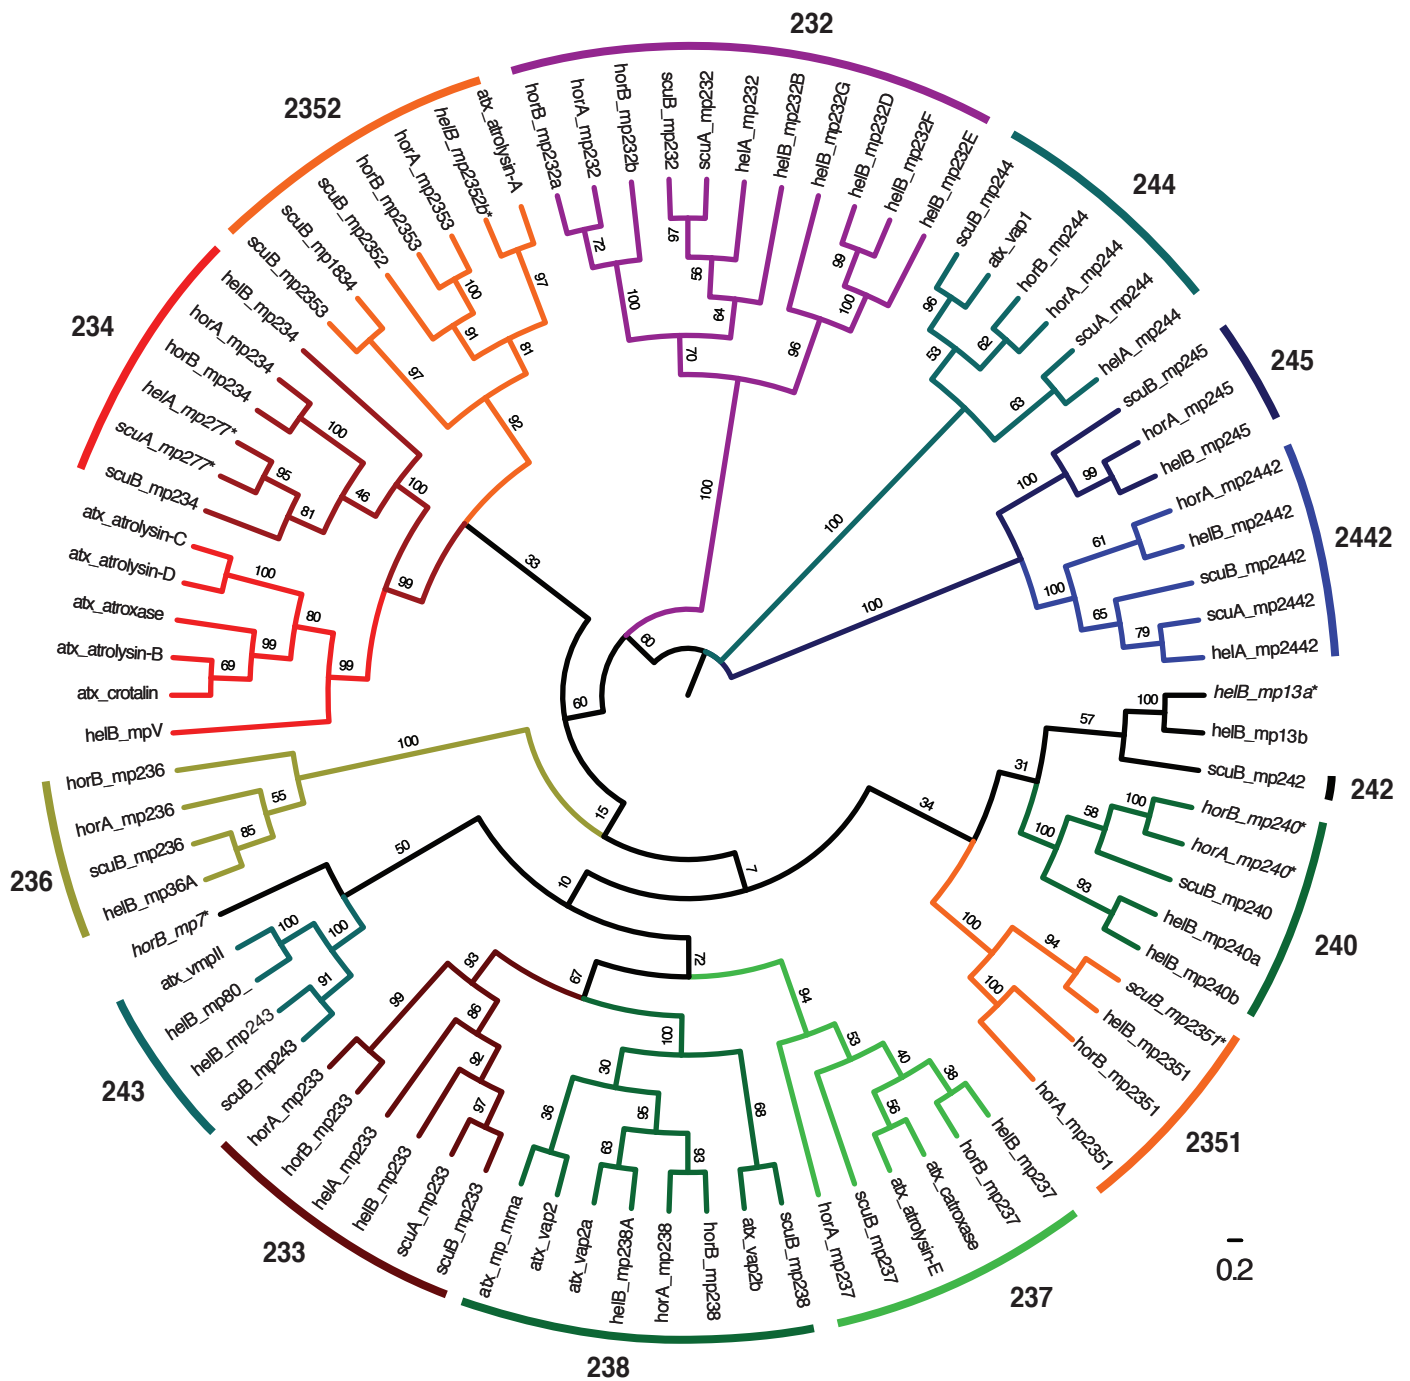

**Figure S3. Phylogenetic analysis of metalloproteinase (MP) domains. Related to Figures 2 and 4.** Protein phylogeny of the metalloproteinase domains (exons 7-12) was used to ascertain the orthologous genes in each species complex. We have also included venom expressed *C. atrox* proteins available in sequence databases (clustering with 234). Large gaps in the colored arcs on the perimeter highlight lineage specific MP proteins that cluster poorly with the *C. scutulatus* MP protein groups (*helB*\_mp13a\*, *helB*\_mp13b, *horB*\_mp7\* and *helB*\_mp-V). In several instances there are mutations in what appear to be pseudogenes (italics) as they would result in untranslated or truncated products. In these instances, where the exonic structure remains intact with viable sequence information, we use that sequence to reconstruct the phylogenetic relationships of genes and likely pseudogenes in the complex. Asterisk (\*): *helB* mp2352b has a stop codon in exon 6; *helB* mp242a has three indels resulting in a frameshift mutation; *horA* and *horB* mp240 have deletions of exons 2-5; *scuB* mp2351 has a deletion of exons 13 and 14; *horB* mp7 has a small deletion in exon 10 which results in an early stop codon; *scuA* and *helA* mp277 is the fusion of mp234 and mp243 created by the genomic deletion and *scuA* and *helA* mp277 have deletions of exons 1 and 2. Note that the mp277 metalloproteinase domain clusters with members of 234 but the N terminal exons cluster with 243 (not shown) as expected from sequence alignment (see figure 4). Bootstrap values from 1,000 replicate trees are indicated on branches. Species included: *C. atrox* (*atx*), *C. scutulatus* A and B types (*scuA* & *scuB*), *C. helleri* A and B types (*helA* & *helB*), *C. adamanteus* (*adm*), *C. horridus* A and B types (*horA* & *horB*).

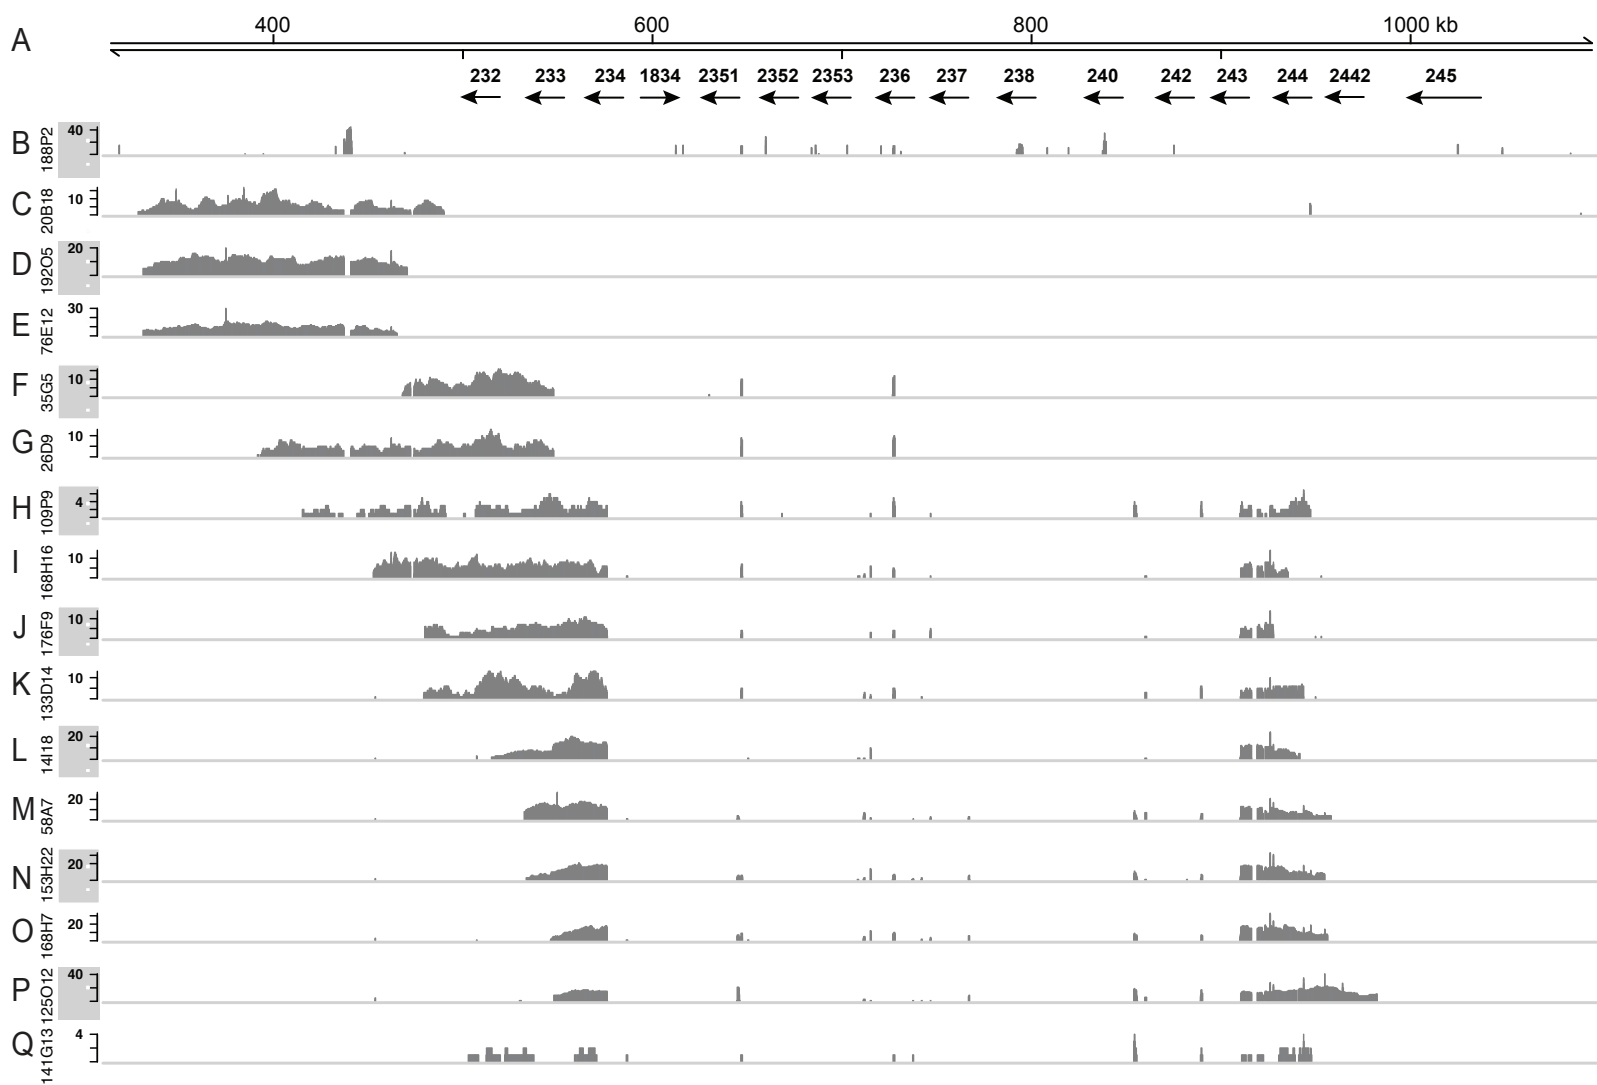

**Figure S4. Alignment of individual *C. scutulatus* type A BAC clones of the MP complex. Related to Figure 2.**

Numerous clones were isolated and sequenced to confirm the large deletion in type A individuals relative to type B individuals, and to determine whether the deleted sequence had been translocated to another site in the genome. (A) The relative positions and orientations (arrowheads) of the genes in the *C. scutulatus* type B MP complex. (B - Q) Sixteen individual *C. scutulatus* type A BAC clones were independently sequenced and assembled. Corrected reads were aligned to the type B MP complex and read coverage (grey histograms) for each unique clone is shown in each corresponding track. Single clone identifiers are on the y-axis. Note the sparse read coverage across the middle (> 300 kb) of the *C. scutulatus* type B MP gene complex. Spurious coverage peaks in this region are likely due to alignment of short reads to repetitive sequences. Ten unique clones (H - Q) have reads aligning to both sides of the genomic segment that spans from gene 234 to 243 thus offering conclusive evidence that the intervening genomic sequence has been deleted from the *C. scutulatus* type A haplotype. Therefore the ten clones (H - Q) *C. scutulatus* type A SVMP BAC clones that span the SVMP gene complex all contain the deletion haplotype.

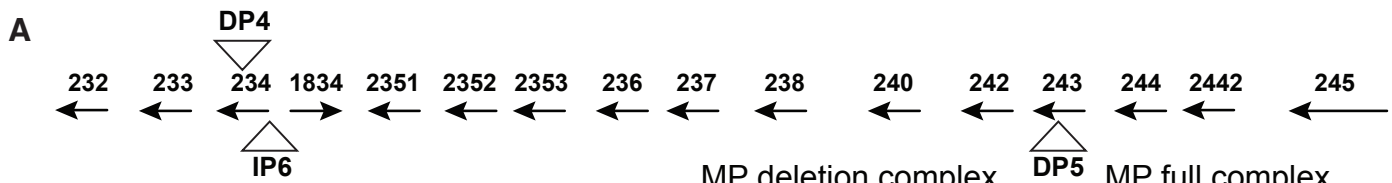

**B**

predicted product size (bp)  
for each complex

|           | full     | deletion |
|-----------|----------|----------|
| DP4 + DP5 | > 330000 | 1504     |
| DP4 + IP6 | 1549     | 0        |

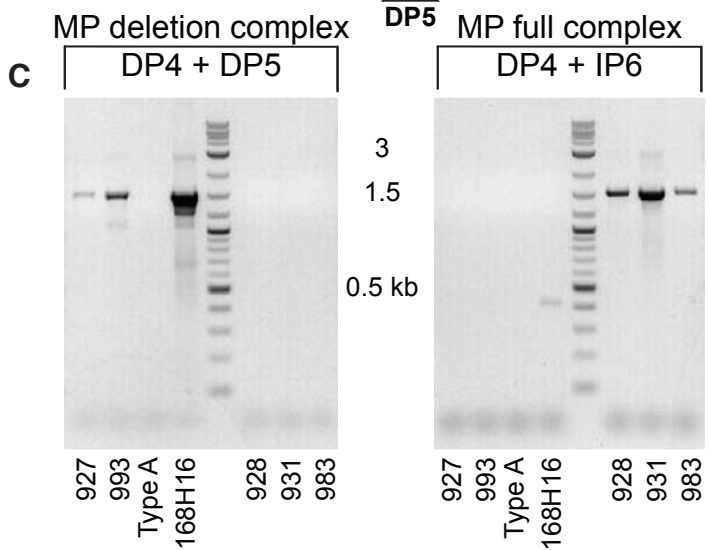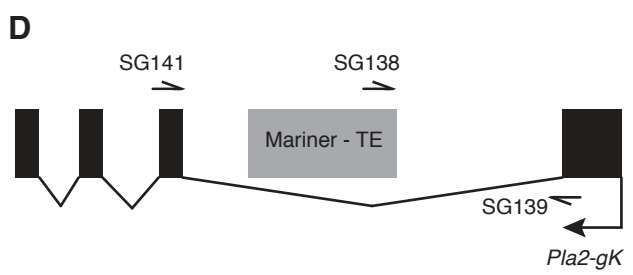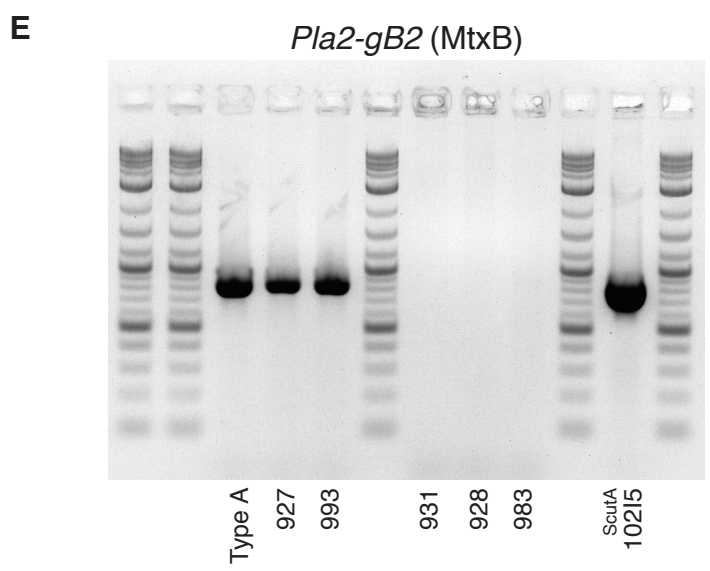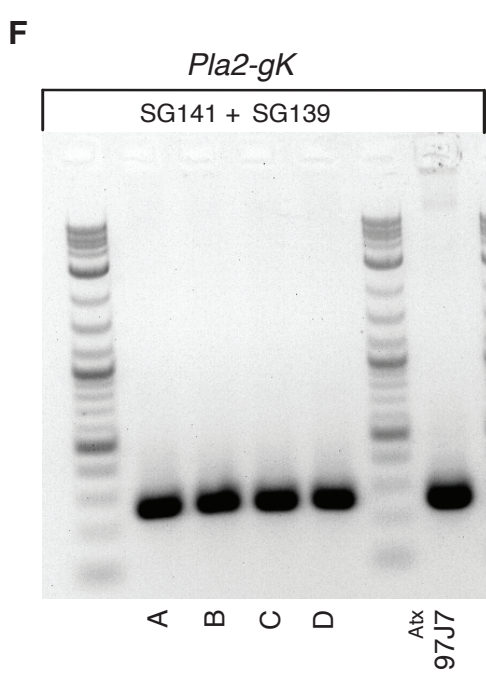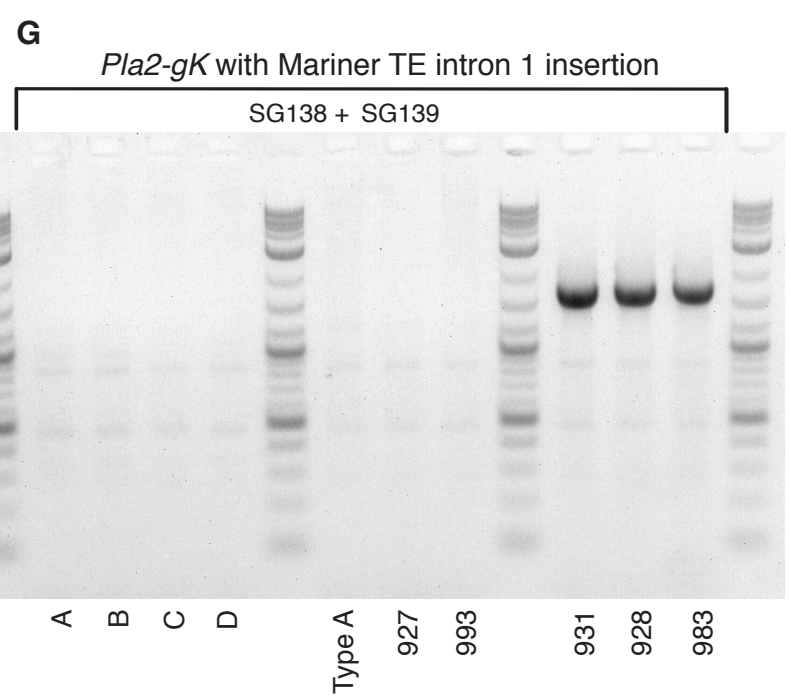

**Figure S5. Genotyping *C. scutulatus* individuals for *Pla2* and metalloproteinase (MP) haplotypes. Related to Figures 2 and 4.**

(A) PCR primers (DP4, DP5, IP6; triangles) were designed to the *C. scutulatus* type B MP complex such that presence or absence of products indicates the full or deleted MP complex. (B) The combination of DP4 and IP6 yields a product of 1549 base pairs (bp) on the *C. scutulatus* type B full complex but yields no product when using genomic template from type A specimens because IP6 is designed for sequence adjacent to the deletion boundary (MP full complex gel). MP clone 168H16 is one of the ten deletion spanning clones isolated from the *C. scutulatus* type A whole genome BAC library (Figure S4-I). If the entire genomic region between *MP 234* and *MP 243* is deleted (as observed in clone 168H16) then primers DP4 and DP5 are predicted to yield a product of 1504 bp. (C) Using genomic template from *C. scutulatus* type A specimens 927 and 993 amplifies the DP4/DP5 1504 bp product. The “Type A” specimen genomic DNA performed poorly in PCR assays but the whole genomic type A BAC library (e.g. clone 168H16) was created using the DNA from this particular specimen. (D) To test for the presence/absence of *Pla2-gK* with/without the Mariner-TE inserted into intron one, PCR primers were designed to exons 1 and 2 (half arrows, SG139 and SG141, respectively) and to the Mariner TE (SG138). PCR primers were also designed to the *C. scutulatus Pla2-gB2* (MtxB) gene to test for the presence/absence of the neurotoxin haplotype. (E) All type A specimens (Type A, 927, 993) have the *Pla2-gB2* gene but all of the type B specimens (931, 928, 983) lack the *Pla2-gB2* gene. (F) The presence of *Pla2-gK* (without an insertion in intron 1) in four *C. atrox* specimens (A – D labels) is shown along with a BAC clone (91J7) known to contain *Pla2-gK*. (G) The *Pla2-gK* with a Mariner TE insertion is present in all three *C. scutulatus* type B specimens (931, 928, 983) but absent in type A specimens (Type A, 927, 993) and *C. atrox* specimens (A – D). For the specimens in this study there is no evidence of heterozygotes that possess the neurotoxic haplotype and the *Pla2-gK* haplotype. The 2-log DNA ladder is shown on all gels.

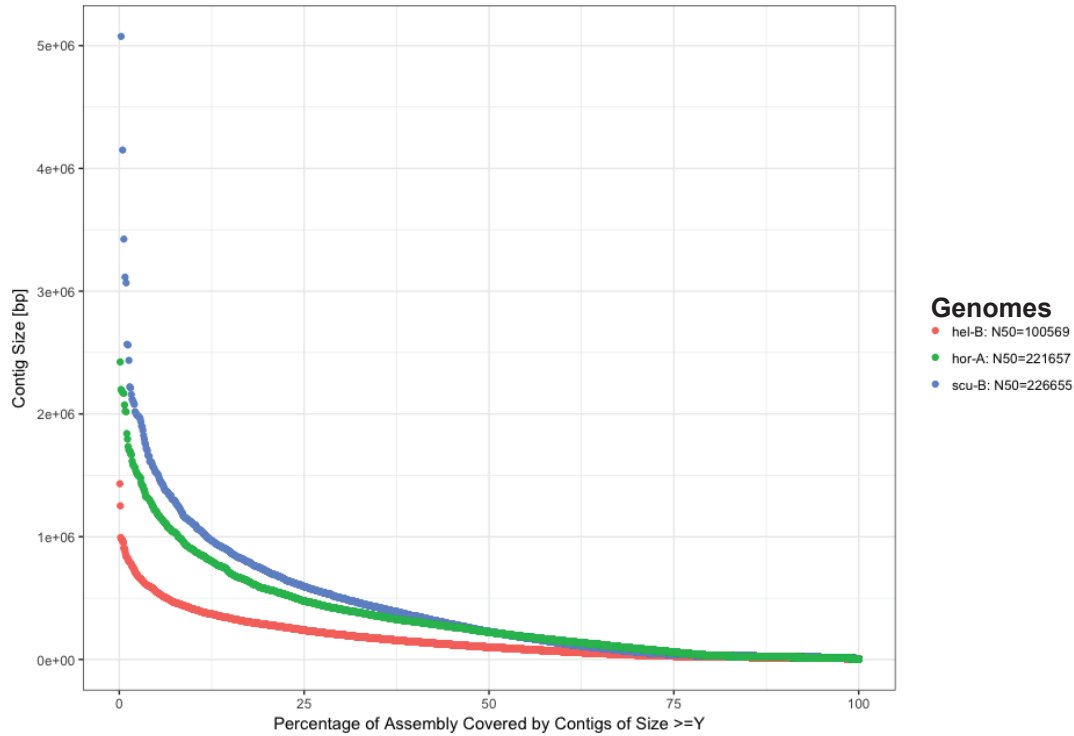

**Figure S6. The contig lengths for three raw genome assemblies. Related to Figures 2 – 4.**

The contig lengths (y-axis) that correspond to the percentage of the genome (x-axis) that is covered by contigs of that size are shown for three rattlesnake genome assemblies. *C. helleri* type B (red dots), *C. scutulatus* type B (blue dots) and *C. horridus* type A (green dots). The shortest contig lengths in base pairs (bp) covering 50% of the genome (N50) are 100569 for *C. helleri* (hel-B), 226655 for *C. scutulatus* (scu-B) and 221657 for *C. horridus* (hor-A). The N50 statistic reports the quality of an assembly in terms of contiguity.



| Species              | Specimen ID   | Location                                                                | Venom type<br>A = Neurotoxic<br>B = Hemorrhagic |
|----------------------|---------------|-------------------------------------------------------------------------|-------------------------------------------------|
| <i>C. scutulatus</i> | NA            | Brewster Co. TX                                                         | A                                               |
| <i>C. scutulatus</i> | 927           | San Bernardino Co., CA                                                  | A                                               |
| <i>C. scutulatus</i> | 993           | Cochise Co., AZ                                                         | A                                               |
| <i>C. scutulatus</i> | 928           | Pima Co., AZ                                                            | B                                               |
| <i>C. scutulatus</i> | 931           | Pima Co., AZ                                                            | B                                               |
| <i>C. scutulatus</i> | 983           | Pima Co., AZ                                                            | B                                               |
|                      |               |                                                                         |                                                 |
| <i>C. helleri</i>    | 677           | Riverside Co., CA                                                       | A                                               |
| <i>C. helleri</i>    | 789           | Born at NNTRC<br>mother was from<br>Riverside Co. CA<br>(also a type B) | B                                               |
|                      |               |                                                                         |                                                 |
| <i>C. horridus</i>   | CH-A090108-06 | Jasper Co., SC<br>(parent origin)                                       | A                                               |
| <i>C. horridus</i>   | CHO114KY      | Floyd Co., KY                                                           | B                                               |

**Table S1. Rattlesnake specimen location and venom type. Related to Figure 1.**

*C. scutulatus* hemorrhagic (type B) and *C. helleri* neurotoxic (type A) specimens were identified by using the median lethal dose (LD<sub>50</sub>) of venom on BALB/C mice. LD<sub>50</sub> values were used to classify individuals as neurotoxic (type A) if the LD<sub>50</sub> was between 0.3 - 0.9 mg/kg or as hemorrhagic (type B) if the LD<sub>50</sub> was > 3.0 mg/kg<sup>13</sup>. The LD<sub>50</sub> values for venom from the *C. scutulatus* type B specimens 928, 931, 983 were 3.25, 3.95, 4.7 mg/kg, respectively. The LD<sub>50</sub> values for the *C. oreganus helleri* type A and B specimens were 0.56 and 3.0 mg/kg, respectively.

| Species              | Venom type      | Seq library tissue | PacBio RS II sequencing material | Venom complex | Clones                 | Raw data accession                     |
|----------------------|-----------------|--------------------|----------------------------------|---------------|------------------------|----------------------------------------|
| <i>C. scutulatus</i> | Neurotoxic (A)  | Blood              | BAC                              | PLA2          | 102I5                  | SRR3478362                             |
| <i>C. scutulatus</i> | Neurotoxic (A)  | Blood              | BAC                              | SVMP          | 125O1<br>2<br>133D14   | SRR5858077<br>SRR5858076               |
| <i>C. helleri</i>    | Neurotoxic (A)  | Blood              | BAC                              | PLA2          | 85A17                  | SRR5858079                             |
| <i>C. helleri</i>    | Neurotoxic (A)  | Blood              | BAC                              | SVMP          | 46A6<br>136F17         | SRR5858078<br>SRR5858071               |
| <i>C. horridus</i>   | Hemorrhagic (B) | Blood              | BAC                              | PLA2          | 190H17                 | SRR5858070                             |
| <i>C. horridus</i>   | Hemorrhagic (B) | Blood              | BAC                              | SVMP          | 27I3<br>145P9<br>132M5 | SRR5858069<br>SRR5858068<br>SRR5858067 |
| <i>C. scutulatus</i> | Hemorrhagic (B) | Blood              | Whole genome                     | PLA2, SVMP    | N/A                    | SRR6410430                             |
| <i>C. helleri</i>    | Hemorrhagic (B) | Blood              | Whole genome                     | PLA2, SVMP    | N/A                    | SRR6410429                             |
| <i>C. horridus</i>   | Neurotoxic (A)  | Blood              | Whole genome                     | PLA2, SVMP    | N/A                    | SRR6410431                             |

**Table S2. Genome sequence data types assembled and annotated to characterize the PLA2 and SVMP gene complexes in three species of rattlesnake. Related to Figures 2 – 4.**

Whole genome bacterial artificial chromosome (BAC) libraries were constructed from *C. scutulatus* type A, *C. helleri* type A and *C. horridus* type B genomic DNA that was isolated from whole blood. Clones for specific venom gene complexes (PLA2 or SVMP) were isolated from the library and sequenced using Pacific Biosciences technology (PacBio RS II). The raw sequencing data for each clone are available at the Short Read Archive database (Raw data accession numbers). Additionally, genomic DNA was extracted from the blood of *C. scutulatus* type B, *C. helleri* type B and *C. horridus* type A specimens and sequenced using Pacific Biosciences technology (PacBio RS II). Contigs containing the PLA2 and SVMP gene complexes were extracted from the raw assemblies and annotated. The raw data (reads) used to generate the assemblies are available at the Short Read Archive database (Raw data accession numbers).

| Species              | Venom           | # raw reads | Raw seq. (bp) | Est. coverage (1.8 – 1.4 G bp genome) | # contigs | Contig N50 (kb) | Median contig length (kb) | Raw assembly length |
|----------------------|-----------------|-------------|---------------|---------------------------------------|-----------|-----------------|---------------------------|---------------------|
| <i>C. scutulatus</i> | Hemorrhagic (B) | 4474901     | 47917343033   | 26 – 34X                              | 32065     | 227             | 23.9                      | 2030922379          |
| <i>C. helleri</i>    | Hemorrhagic (B) | 9607654     | 66869924141   | 37 – 47X                              | 45034     | 101             | 18.1                      | 1878780749          |
| <i>C. horridus</i>   | Neurotoxic (A)  | 5322653     | 57746831678   | 32 – 41X                              | 31766     | 222             | 19.2                      | 1875843582          |

**Table S3. Summary statistics for three rattlesnake genome assemblies. Related to Figures 2 – 4.**

Genomic DNA was extracted from whole blood and large insert sequencing libraries constructed (see methods for details). The libraries were sequenced until ~ 35X genome coverage was obtained. The *Crotalus* genome size is estimated to be 1.4 to 1.8 Giga base pairs (G bp). The raw reads were error corrected and assembled (see methods) to yield contigs. The contigs containing the PLA2 and SVMP gene complexes were annotated in this study. Whole genome analysis is currently in progress.

| species     | contig ID | gene IDs | gene status | exons_for_partial_genes | MEPRO domain |
|-------------|-----------|----------|-------------|-------------------------|--------------|
| C.helleri-B | 58718     | MP232F   | partial     | MP232F:ex 6 - 11        | yes          |
| C.helleri-B | 58940     | MP232A   | partial     | MP232A:ex 14 -17        | no           |
| C.helleri-B | 61437     | MP232B   | partial     | MP232B:ex 9 - 11        | yes          |
| C.helleri-B | 84783     | MP232C   | partial     | MP232C:ex 12 -17        | no           |
| C.helleri-B | 87611     | MP232E   | partial     | MP232E:ex 6 - 12        | yes          |
| C.helleri-B | 87610     | MP232D   | partial     | MP232D:ex 1 - 10        | yes          |
| C.helleri-B | 87610     | MP232H   | partial     | MP232H:ex 12 -17        | no           |
| C.helleri-B | 96453     | MP232G   | partial     | MP232G:ex 9 - 13        | yes          |
| C.helleri-B | 90179     | MP233A   | partial     | MP233A:ex 5 - 14,17     | yes          |
| C.helleri-B | 67486     | MP233B   | partial     | MP233B:ex 1 - 2         | no           |
| C.helleri-B | 67486     | MP234    | partial     | MP234:ex 3 - 17         | yes          |
| C.helleri-B | 64313     | MP1834   | partial     | MP1834:ex 15 - 17       | no           |
| C.helleri-B | 64313     | MP2351   | full        | MP2351:ex 1 - 17        | yes          |
| C.helleri-B | 64313     | MP2352A  | partial     | MP2352A:ex 11 -17       | no           |
| C.helleri-B | 68240     | MP2352B  | partial     | MP2352B:ex 7 - 17       | yes*         |
| C.helleri-B | 66196     | MP-7     | partial     | MP-F:ex 12 - 17         | no           |
| C.helleri-B | 66196     | MP2352C  | partial     | MP2352C:ex 1            | no           |
| C.helleri-B | 94164     | MP-10m   | partial     | MP-10m:ex 9 - 11        | no           |
| C.helleri-B | 94164     | MP-Fm    | partial     | MP-Fm:ex 7 - 8          | no           |
| C.helleri-B | 70926     | MP236    | partial     | MP236:ex 9 - 14         | yes          |
| C.helleri-B | 71561     | MP237    | partial     | MP237:ex 11 - 14, 17    | yes          |
| C.helleri-B | 70695     | MP238A   | partial     | MP238A:ex 9 -15         | yes          |
| C.helleri-B | 72085     | MP238B   | partial     | MP238B:ex 1 - 6         | no           |
| C.helleri-B | 60881     | MP238C   | partial     | MP238C:ex 1             | no           |
| C.helleri-B | 87327     | MP-V     | full        |                         | yes          |
| C.helleri-B | 87327     | MP240A   | partial     | MP240A:ex 10 - 17       | yes          |
| C.helleri-B | 60407     | MP240B   | partial     | MP240B:ex 1 - 14        | yes          |
| C.helleri-B | 60407     | MP243    | full        |                         | yes          |
| C.helleri-B | 60407     | MP80     | full        |                         | yes          |
| C.helleri-B | 60407     | MP13A    | partial     | MP13A:ex 10 - 17        | yes          |
| C.helleri-B | 73042     | MP243    | partial     | MP243:ex 1 - 3          | no           |
| C.helleri-B | 73042     | MP244    | partial     | MP244:ex 15 - 17        | no           |
| C.helleri-B | 60942     | MP13B    | partial     | MP13B:ex 1 - 14         | yes          |
| C.helleri-B | 60942     | MP2442   | full        |                         | yes          |
| C.helleri-B | 60942     | MP245    | full        |                         | yes          |

**Table S4. Summary of *C. helleri* type B SVMP gene complex annotation. Related to Figure 4.** For this study, our annotation and phylogenetic analysis efforts focused on the conserved metalloproteinase domain (exons 7 -12). However, there are some partial MP genes found across the twenty-two contigs. For example, there are three C-terminal exons for 1834 on contig 64313 and

they are adjacent the C-terminal exons of 2351 as they are in *C. scutulatus* type B. There are five *C. helleri* duplicated 232 genes with annotatable metalloproteinase domains but exon evidence for three additional 232 genes giving a total of 8 putative 232 genes. MP-V is a homolog of *C. atrox* atrolysin MP proteins (see Figure S3) and is not present in the *C. scutulatus* MP complex. MP-80 is a homolog of *C. atrox* SVMP II and is not present in the *C. scutulatus* MP complex. MP13a and 13b are homologs of scuB\_mp242 but there is uncertainty regarding the exact orthology (see Figure S3).
